# Supplementary material for: Scalable Infrastructure Supporting Reproducible Nationwide Healthcare Data Analysis toward FAIR Stewardship
Source: PubMed Central journal article supplement (PMC10550904; doi:10.1038/s41597-023-02580-7), 2023-10-04
Supplement: 41597_2023_2580_MOESM1_ESM.pdf [file 41597_2023_2580_MOESM1_ESM.pdf]

## Supplementary information

Supplement to: JW Kim, C Kim et al. Scalable Infrastructure Supporting Reproducible Nationwide Healthcare Data Analysis toward FAIR Stewardship.

### Table of Contents

|                                                                                                                         |    |
|-------------------------------------------------------------------------------------------------------------------------|----|
| Table S1. Number of records by year, type of visit and type of medical institution in the source and CDM databases..... | 2  |
| Table S2. Number of records for the top 10 of conditions in the source and CDM databases.....                           | 3  |
| Table S3. Number of records for the top 10 of primary conditions in the source and CDM databases.....                   | 4  |
| Table S4. Number of records for the top 10 of procedure code in the source and CDM databases.....                       | 5  |
| Table S5. Number of records for the top 10 of drug code in the source and CDM databases.....                            | 6  |
| Table S6. Number of records for the top 10 of device code in the source and CDM databases.....                          | 7  |
| Table S7. Results of the number of patients with type 2 diabetes mellitus by year and gender.....                       | 8  |
| Table S8. Results of the number of patients with type 2 diabetes mellitus by year and age groups.....                   | 9  |
| Table S9. FAIR principles and HIRA open data strategy.....                                                              | 13 |
| Table S10. Performance results of COVER models using the HIRA databases having different data periods.....              | 12 |
| REFERENCES.....                                                                                                         | 16 |

**Table S1. Number of records by year, type of visit and type of medical institution in the source and CDM databases**

| <b>Category</b>               | <b>Source database (A)</b> | <b>CDM database (B)</b> | <b>Difference (A-B)</b> |
|-------------------------------|----------------------------|-------------------------|-------------------------|
| <b>Total, n</b>               | 10,098,730,241             | 10,098,730,241          | 0                       |
| <b>Year, n</b>                |                            |                         |                         |
| 2010                          | 818,149,295                | 818,149,295             | 0                       |
| 2011                          | 836,105,372                | 836,105,372             | 0                       |
| 2012                          | 899,170,379                | 899,170,379             | 0                       |
| 2013                          | 909,869,673                | 909,869,673             | 0                       |
| 2014                          | 929,260,544                | 929,260,544             | 0                       |
| 2015                          | 924,941,727                | 924,941,727             | 0                       |
| 2016                          | 962,266,678                | 962,266,678             | 0                       |
| 2017                          | 963,926,363                | 963,926,363             | 0                       |
| 2018                          | 982,196,844                | 982,196,844             | 0                       |
| 2019                          | 1,001,317,069              | 1,001,317,069           | 0                       |
| 2020                          | 871,526,297                | 871,526,297             | 0                       |
| <b>Type of visit, n</b>       |                            |                         |                         |
| Outpatient                    | 9,915,565,629              | 9,915,565,629           | 0                       |
| Inpatient                     | 183,164,605                | 183,164,605             | 0                       |
| Others                        | 7                          | 7                       | 0                       |
| <b>Type of institution, n</b> |                            |                         |                         |
| Hospital                      | 110,094                    | 110,094                 | 0                       |
| Long-term care facility       | 3,496                      | 3,496                   | 0                       |
| Dental hospital               | 33,433                     | 33,433                  | 0                       |
| Others                        | 66,735                     | 66,735                  | 0                       |

CDM: common data model

**Table S2. Number of records for the top 10 of conditions in the source and CDM databases**

| Rank | ICD code | Name                                                                  | Source data (A) | HIRA CDM (B)  | Difference (A-B) |
|------|----------|-----------------------------------------------------------------------|-----------------|---------------|------------------|
| 1    | K29      | Gastritis and duodenitis                                              | 2,044,449,281   | 2,044,449,281 | 0                |
| 2    | J30      | Vasomotor and allergic rhinitis                                       | 1,310,926,642   | 1,310,926,642 | 0                |
| 3    | J20      | Acute bronchitis                                                      | 1,095,587,096   | 1,095,587,096 | 0                |
| 4    | I10      | Angina pectoris                                                       | 839,267,192     | 839,267,192   | 0                |
| 5    | M54      | Dorsalgia                                                             | 603,660,536     | 613,669,343   | -10,008,807      |
| 6    | E78      | Disorder of lipoprotein metabolism and other lipidemias               | 595,275,724     | 595,275,724   | 0                |
| 7    | K21      | Gastro-esophageal reflux disease                                      | 480,293,477     | 480,293,477   | 0                |
| 8    | K30      | Functional dyspepsia                                                  | 456,670,504     | 456,670,504   | 0                |
| 9    | M79      | Other and unspecified soft tissue disorders, not elsewhere classified | 438,788,959     | 452,308,204   | -13,519,245      |
| 10   | E11      | Type 2 diabetes mellitus                                              | 421,685,510     | 423,375,317   | -1,689,807       |

CDM: common data model; ICD: international classification of disease 10<sup>th</sup> revision; HIRA: health insurance review and assessment service

**Table S3. Number of records for the top 10 of primary conditions in the source and CDM databases**

| Rank | ICD code | Name                                                                 | Source data (A) | HIRA CDM (B) | Difference (A-B) |
|------|----------|----------------------------------------------------------------------|-----------------|--------------|------------------|
| 1    | J20      | Acute bronchitis                                                     | 556,586,441     | 556,586,441  | 0                |
| 2    | I10      | Essential (primary) hypertension                                     | 488,322,821     | 488,322,821  | 0                |
| 3    | K05      | Gingivitis and periodontal diseases                                  | 300,085,281     | 314,253,076  | -14,167,795      |
| 4    | M54      | Dorsalgia                                                            | 266,750,063     | 271,071,024  | -4,320,961       |
| 5    | M17      | Osteoarthritis of knee                                               | 204,043,041     | 204,043,041  | 0                |
| 6    | E11      | Type 2 diabetes mellitus                                             | 198,701,427     | 199,371,732  | -670,305         |
| 7    | K04      | Disease of pulp and periapical tissues                               | 181,691,190     | 181,691,190  | 0                |
| 8    | J30      | Vasomotor and allergic rhinitis                                      | 166,255,214     | 166,255,214  | 0                |
| 9    | J03      | Acute tonsillitis                                                    | 150,778,447     | 150,778,447  | 0                |
| 10   | J06      | Acute upper respiratory infections of multiple and unspecified sites | 142,531,952     | 142,531,952  | 0                |

CDM: common data model; ICD: international classification of disease 10<sup>th</sup> revision; HIRA: health insurance review and assessment service

**Table S4. Number of records for the top 10 of procedure code in the source and CDM databases**

| Rank | EDI code | Name                                           | Source data (A) | HIRA CDM (B)  | Difference (A-B) |
|------|----------|------------------------------------------------|-----------------|---------------|------------------|
| 1    | AA254    | Outpatient Care-Established Patient (Clinic)   | 4,253,071,311   | 4,253,071,311 | 0                |
| 2    | AA154    | Outpatient Care-New Patient                    | 2,009,704,686   | 2,009,704,686 | 0                |
| 3    | AL801    | Medication Keeping Fee (Outpatient)            | 1,555,802,026   | 1,555,802,026 | 0                |
| 4    | KK010    | Subcutaneous or Intramuscular Injection        | 1,349,743,910   | 1,349,743,910 | 0                |
| 5    | MM020    | Deep Heat Therapy                              | 741,156,685     | 741,156,685   | 0                |
| 6    | MM015    | Superficial Heat Therapy                       | 730,597,720     | 730,597,720   | 0                |
| 7    | D0002    | Complete Blood Cell Count-Measuring equipment  | 594,885,915     | 277,936       | 594,607,979      |
| 8    | AH200    | Management of Chronic Disease                  | 528,365,443     | 528,365,443   | 0                |
| 9    | AA256    | Outpatient Care-Established Patient (Hospital) | 484,951,406     | 484,951,406   | 0                |
| 10   | MM070    | Transcutaneous Electrical Nerve Stimulation    | 476,389,412     | 476,389,412   | 0                |

CDM: common data model; EDI: electronic data interchange code; HIRA: health insurance review and assessment service

**Table S5. Number of records for the top 10 of drug code in the source and CDM databases**

| Rank | EDI code  | Name                                                                                                                | Source data (A) | HIRA CDM (B) | Difference (A-B) |
|------|-----------|---------------------------------------------------------------------------------------------------------------------|-----------------|--------------|------------------|
| 1    | 642102570 | Chlorpheniramine maleate 2mg                                                                                        | 660,651,573     | 660,651,573  | 0                |
| 2    | 643900710 | Pseudoephedrine hydrochloride 60 mg                                                                                 | 252,889,733     | 252,889,733  | 0                |
| 3    | 643501070 | Streptokinase–streptodornase (streptokinase 10KI.U, streptodornase 2.5KI.U) 12.5KI.U                                | 158,490,880     | 158,490,880  | 0                |
| 4    | 647500350 | Dexibuprofen 0.4g                                                                                                   | 122,903,826     | 122,903,826  | 0                |
| 5    | 646900690 | Acetaminophen(encapsulated) 0.65g                                                                                   | 107,972,313     | 107,972,313  | 0                |
| 6    | 645701150 | chlorpheniramine maleate 1.5mg,dihydrocodeine tartrate 5mg,DL-methylephedrine hydrochloride 17.5mg,guaifenesin 50mg | 106,236,253     | 106,236,253  | 0                |
| 7    | 643501510 | acetaminophen(encapsulated) 0.65g                                                                                   | 102,575,178     | 102,575,178  | 0                |
| 8    | 642401650 | piprinhydrinate 3mg                                                                                                 | 101,619,776     | 101,619,776  | 0                |
| 9    | 671802920 | chlorpheniramine maleate 1.5mg,dihydrocodeine tartrate 5mg,DL-methylephedrine hydrochloride 17.5mg,guaifenesin 50mg | 101,409,694     | 101,409,694  | 0                |
| 10   | 642502290 | Artemisiae argyi folium 95% ethanol ext.(20→1) 60mg                                                                 | 95,196,995      | 95,196,995   | 0                |

CDM: common data model; EDI: electronic data interchange code; HIRA: health insurance review and assessment service

**Table S6. Number of records for the top 10 of device code in the source and CDM databases**

| Rank | EDI code | Name                                                     | Source data (A) | HIRA CDM (B) | Difference (A-B) |
|------|----------|----------------------------------------------------------|-----------------|--------------|------------------|
| 1    | L7250    | Glass ionomer (Chemical polymerization)                  | 47,442,404      | 47,442,404   | 0                |
| 2    | K7202    | Elastic bandage (10cm × 215cm)                           | 40,228,319      | 40,228,319   | 0                |
| 3    | K2062    | Dental film (standard)                                   | 36,372,519      | 36,372,519   | 0                |
| 4    | N0061    | Ni-Ti File for Root-canal enlargement                    | 28,658,980      | 28,658,980   | 0                |
| 5    | K7201    | Elastic bandage (15cm × 215cm)                           | 27,997,908      | 27,997,908   | 0                |
| 6    | K2056    | Plain film (10 inch × 12 inch)                           | 27,078,522      | 27,078,522   | 0                |
| 7    | K2058    | Plain film (8 inch × 10 inch)                            | 25,764,488      | 25,764,488   | 0                |
| 8    | K0001    | Materials for Electrocardiography                        | 24,558,659      | 24,558,659   | 0                |
| 9    | N0041    | Instruments for sub-endoscopic procedures                | 18,785,652      | 18,785,652   | 0                |
| 10   | L7251    | Glass ionomer (Chemical polymerization) Finished Product | 18,683,892      | 18,683,892   | 0                |

CDM: common data model; EDI: electronic data interchange code; HIRA: health insurance review and assessment service

**Table S7. Results of the number of patients with type 2 diabetes mellitus by year and gender**

| Year | Sex    | Source database | HIRA CDM | Differences (A) – (B) |         |
|------|--------|-----------------|----------|-----------------------|---------|
|      |        | N (A)           | N (B)    | N                     | %*      |
| 2012 | Male   | 186,070         | 185,680  | 390                   | (0.21)  |
|      | Female | 140,662         | 140,462  | 200                   | (0.14)  |
| 2013 | Male   | 173,266         | 173,030  | 236                   | (0.14)  |
|      | Female | 131,720         | 131,564  | 156                   | (0.12)  |
| 2014 | Male   | 166,560         | 166,495  | 65                    | (0.04)  |
|      | Female | 125,277         | 125,255  | 22                    | (0.02)  |
| 2015 | Male   | 175,044         | 175,363  | -319                  | -(0.18) |
|      | Female | 129,171         | 129,421  | -250                  | -(0.19) |
| 2016 | Male   | 194,724         | 194,490  | 234                   | (0.12)  |
|      | Female | 143,209         | 143,071  | 138                   | (0.10)  |
| 2017 | Male   | 202,668         | 202,558  | 110                   | (0.05)  |
|      | Female | 147,843         | 147,769  | 74                    | (0.05)  |
| 2018 | Male   | 209,192         | 209,105  | 87                    | (0.04)  |
|      | Female | 147,378         | 147,315  | 63                    | (0.04)  |
| 2019 | Male   | 218,685         | 218,650  | 35                    | (0.02)  |
|      | Female | 155,489         | 155,465  | 24                    | (0.02)  |
| 2020 | Male   | 222,966         | 222,964  | 2                     | (0.00)  |
|      | Female | 161,538         | 161,526  | 12                    | (0.01)  |

\*% =  $\frac{\{(A)-(B)\}}{A} \times 100$ ; HIRA: health insurance review and assessment service; CDM: common data model



**Table S8. Results of the number of patients with type 2 diabetes mellitus by year and age groups**

| Year | Age group | Source database | HIRA CDM | Differences<br>(A) – (B) |         |
|------|-----------|-----------------|----------|--------------------------|---------|
|      |           | N (A)           | N (B)    | N                        | %*      |
| 2012 | 0–19      | 1,662           | 1,678    | -16                      | -(0.96) |
|      | 20–29     | 3,895           | 3,884    | 11                       | (0.28)  |
|      | 30–39     | 20,072          | 20,033   | 39                       | (0.19)  |
|      | 40–49     | 57,456          | 57,333   | 123                      | (0.21)  |
|      | 50–59     | 93,463          | 93,296   | 167                      | (0.18)  |
|      | 60–69     | 71,946          | 71,806   | 140                      | (0.19)  |
|      | 70–79     | 57,412          | 57,304   | 108                      | (0.19)  |
|      | 80–89     | 18,698          | 18,681   | 17                       | (0.09)  |
|      | 90+       | 2,128           | 2,127    | 1                        | (0.05)  |
| 2013 | 0–19      | 1,690           | 1,702    | -12                      | -(0.71) |
|      | 20–29     | 4,018           | 4,019    | -1                       | -(0.02) |
|      | 30–39     | 19,639          | 19,619   | 20                       | (0.10)  |
|      | 40–49     | 54,283          | 54,221   | 62                       | (0.11)  |
|      | 50–59     | 88,073          | 87,958   | 115                      | (0.13)  |
|      | 60–69     | 66,121          | 66,001   | 120                      | (0.18)  |
|      | 70–79     | 51,823          | 51,745   | 78                       | (0.15)  |
|      | 80–89     | 17,270          | 17,262   | 8                        | (0.05)  |
|      | 90+       | 2,069           | 2,067    | 2                        | (0.10)  |
| 2014 | 0–19      | 1,842           | 1,865    | -23                      | -(1.25) |
|      | 20–29     | 4,268           | 4,269    | -1                       | -(0.02) |
|      | 30–39     | 19,437          | 19,440   | -3                       | -(0.02) |
|      | 40–49     | 52,069          | 52,020   | 49                       | (0.09)  |
|      | 50–59     | 83,815          | 83,787   | 28                       | (0.03)  |
|      | 60–69     | 63,329          | 63,296   | 33                       | (0.05)  |
|      | 70–79     | 48,163          | 48,149   | 14                       | (0.03)  |
|      | 80–89     | 16,908          | 16,913   | -5                       | -(0.03) |
|      | 90+       | 2,006           | 2,011    | -5                       | -(0.25) |

|      |       |        |        |      |         |
|------|-------|--------|--------|------|---------|
| 2015 | 0–19  | 1,904  | 1,917  | -13  | -(0.68) |
|      | 20–29 | 4,485  | 4,492  | -7   | -(0.16) |
|      | 30–39 | 20,118 | 20,177 | -59  | -(0.29) |
|      | 40–49 | 53,409 | 53,521 | -112 | -(0.21) |
|      | 50–59 | 87,754 | 87,923 | -169 | -(0.19) |
|      | 60–69 | 69,107 | 69,241 | -134 | -(0.19) |
|      | 70–79 | 47,682 | 47,740 | -58  | -(0.12) |
|      | 80–89 | 17,683 | 17,703 | -20  | -(0.11) |
|      | 90+   | 2,073  | 2,070  | 3    | (0.14)  |
| 2016 | 0–19  | 2,498  | 2,510  | -12  | -(0.48) |
|      | 20–29 | 5,294  | 5,279  | 15   | (0.28)  |
|      | 30–39 | 22,453 | 22,409 | 44   | (0.20)  |
|      | 40–49 | 58,617 | 58,551 | 66   | (0.11)  |
|      | 50–59 | 97,444 | 97,310 | 134  | (0.14)  |
|      | 60–69 | 79,175 | 79,068 | 107  | (0.14)  |
|      | 70–79 | 51,210 | 51,186 | 24   | (0.05)  |
|      | 80–89 | 19,106 | 19,110 | -4   | -(0.02) |
|      | 90+   | 2,136  | 2,138  | -2   | -(0.09) |
| 2017 | 0–19  | 2,436  | 2,447  | -11  | -(0.45) |
|      | 20–29 | 5,550  | 5,545  | 5    | (0.09)  |
|      | 30–39 | 23,348 | 23,340 | 8    | (0.03)  |
|      | 40–49 | 59,386 | 59,364 | 22   | (0.04)  |
|      | 50–59 | 99,207 | 99,147 | 60   | (0.06)  |
|      | 60–69 | 83,704 | 83,652 | 52   | (0.06)  |
|      | 70–79 | 53,837 | 53,802 | 35   | (0.07)  |
|      | 80–89 | 20,657 | 20,642 | 15   | (0.07)  |
|      | 90+   | 2,386  | 2,388  | -2   | -(0.08) |
| 2018 | 0–19  | 2,660  | 2,656  | 4    | (0.15)  |
|      | 20–29 | 6,283  | 6,274  | 9    | (0.14)  |
|      | 30–39 | 24,494 | 24,491 | 3    | (0.01)  |
|      | 40–49 | 58,835 | 58,805 | 30   | (0.05)  |

|      |       |         |         |     |         |
|------|-------|---------|---------|-----|---------|
|      | 50–59 | 100,558 | 100,522 | 36  | (0.04)  |
|      | 60–69 | 86,609  | 86,571  | 38  | (0.04)  |
|      | 70–79 | 53,484  | 53,465  | 19  | (0.04)  |
|      | 80–89 | 21,144  | 21,134  | 10  | (0.05)  |
|      | 90+   | 2,503   | 2,502   | 1   | (0.04)  |
| 2019 | 0–19  | 2,562   | 2,581   | -19 | -(0.74) |
|      | 20–29 | 6,998   | 6,988   | 10  | (0.14)  |
|      | 30–39 | 25,665  | 25,660  | 5   | (0.02)  |
|      | 40–49 | 59,925  | 59,914  | 11  | (0.02)  |
|      | 50–59 | 102,825 | 102,806 | 19  | (0.02)  |
|      | 60–69 | 93,243  | 93,229  | 14  | (0.02)  |
|      | 70–79 | 56,567  | 56,559  | 8   | (0.01)  |
|      | 80–89 | 23,391  | 23,380  | 11  | (0.05)  |
|      | 90+   | 2,998   | 2,998   | 0   | (0.00)  |
| 2020 | 0–19  | 2,584   | 2,596   | -12 | -(0.46) |
|      | 20–29 | 7,685   | 7,692   | -7  | -(0.09) |
|      | 30–39 | 26,035  | 26,030  | 5   | (0.02)  |
|      | 40–49 | 60,752  | 60,752  | 0   | (0.00)  |
|      | 50–59 | 103,779 | 103,769 | 10  | (0.01)  |
|      | 60–69 | 100,147 | 100,142 | 5   | (0.00)  |
|      | 70–79 | 57,121  | 57,113  | 8   | (0.01)  |
|      | 80–89 | 23,591  | 23,589  | 2   | (0.01)  |
|      | 90+   | 2,810   | 2,807   | 3   | (0.11)  |

\*% =  $\frac{\{(A)-(B)\}}{A} \times 100$ ; HIRA: health insurance review and assessment service; CDM: common data model

**Table S9. Performance results of COVER models using the HIRA databases having different data periods**

| <b>Data period</b> | <b>Population (n)</b>             | <b>Outcome (n, [%])</b>                          | <b>AUC</b> | <b>AUPRC</b> |
|--------------------|-----------------------------------|--------------------------------------------------|------------|--------------|
| –2020 Apr*         | Covid-19 infection<br>(1 985)     | Hospitalization for pneumonia<br>(89 [4.48%])    | 0.806      | 0.134        |
|                    |                                   | ICU or death due to pneumonia<br>(22 [1.11%])    | 0.910      | 0.053        |
|                    |                                   | All cause death (43 [2.17%])                     | 0.898      | 0.150        |
| –2020 Dec          | Covid-19 infection<br>(32 633)    | Hospitalization for pneumonia<br>(1 250 [3.83%]) | 0.816      | 0.149        |
|                    |                                   | ICU or death due to pneumonia<br>(188 [0.58%])   | 0.891      | 0.036        |
|                    |                                   | All cause death (205 [0.63%])                    | 0.892      | 0.052        |
| –2022 Apr          | Covid-19 infection<br>(1 530 350) | Hospitalization for pneumonia<br>(4 806 [0.31%]) | 0.748      | 0.013        |
|                    |                                   | ICU or death due to pneumonia<br>(487 [0.03%])   | 0.879      | 0.003        |
|                    |                                   | All cause death (1 190 [0.08%])                  | 0.891      | 0.012        |

\*Results from data (–2020 Apr) are cited from previously published paper (Williams, R.D et al).<sup>1</sup>

COVER: Covid-19 Estimated Risk; HIRA: health insurance review and assessment service; Covid-19: coronavirus disease 2019; ICU: intensive care unit; AUC: area under the receiver operating characteristics curve; AUPRC: area under the precision-recall curve.

**Table S10. FAIR principles and HIRA open data strategy**

| FAIR principles                                                                                 | Strategy of HIRA                                                                                                                                                                                                                                                                                                                                                                                                                                                                                                                                                                                                                 |
|-------------------------------------------------------------------------------------------------|----------------------------------------------------------------------------------------------------------------------------------------------------------------------------------------------------------------------------------------------------------------------------------------------------------------------------------------------------------------------------------------------------------------------------------------------------------------------------------------------------------------------------------------------------------------------------------------------------------------------------------|
| <b>Findable</b>                                                                                 |                                                                                                                                                                                                                                                                                                                                                                                                                                                                                                                                                                                                                                  |
| F1. (Meta)data are assigned a globally unique and persistent identifier                         | The source data of the HIRA CDM is the claims details collected in accordance with the National Health Insurance Act. The information collected includes personal identification numbers (resident registration numbers) managed by the government and medical institution numbers. Since related identifiers are managed by the country, they can be used uniquely and persistently. OMOP-CDM uses OMOP standardized vocabulary, so identifiers for all records other than individual patient identifiers are globally unique, persistent, and disclosed ( <a href="https://athena.ohdsi.org/">https://athena.ohdsi.org/</a> ). |
| F2. Data are described with rich metadata(defined by R1 below)                                  | The structure of HIRA CDM is same with the OMOP-CDM version 5.3. The meta data of OMOP-CDM version 5.3 is in online repository ( <a href="https://ohdsi.github.io/CommonDataModel/cdm53.html">https://ohdsi.github.io/CommonDataModel/cdm53.html</a> )                                                                                                                                                                                                                                                                                                                                                                           |
| F3. Metadata clearly and explicitly include the identifier of the data they describe            | The database is built according to the structure of OMOP-CDM version 5.3, and the data structure and column names of the HIRA CDM database can be checked using the metadata of OMOP-CDM. In addition, metadata, table schema, and sample data are disclosed so that external researchers can fully understand the structure of the data.                                                                                                                                                                                                                                                                                        |
| F4. (Meta)data are registered or indexed in a searchable resource                               | If you search for “healthcare distributed research network” on Google, you can find the HDRN webpage, and if you search for “hdrn hira cdm”, you will find a link to a page where you can download sample data of HIRA CDM provided by HDRN.                                                                                                                                                                                                                                                                                                                                                                                     |
| 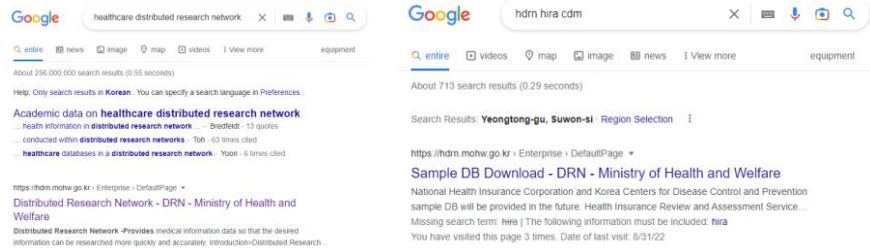             |                                                                                                                                                                                                                                                                                                                                                                                                                                                                                                                                                                                                                                  |
| <b>Accessible</b>                                                                               |                                                                                                                                                                                                                                                                                                                                                                                                                                                                                                                                                                                                                                  |
| A1. (Meta)data are retrievable by their identifier using a standardised communications protocol | Information on the HIRA database can be found on the HDRN website ( <a href="https://hdrn.mohw.go.kr">https://hdrn.mohw.go.kr</a> ), and all websites can be accessed through HTTPS.                                                                                                                                                                                                                                                                                                                                                                                                                                             |

---

A1.1 The protocol is open, free, and universally implementable Information on the HIRA database can be found on the HDRN website (<https://hdrn.mohw.go.kr>), which can be accessed for free.

A1.2 The protocol allows for an authentication and authorisation procedure, where necessary No special authentication procedure is required for HDRN website access, if necessary, authorization is performed through the login process.

A2. Metadata are accessible, even when the data are no longer available Meta information and sample data are maintained through version management even for databases that are not in use.

### Interoperable

I1. (Meta)data use a formal, accessible, shared, and broadly applicable language for knowledge representation To ensure automatic findability and interoperability of datasets, HIRA CDM use controlled vocabularies (well-known, broadly adopted medical ontologies) and fully specified data model (OMOP-CDM).

I2. (Meta)data use vocabularies that follow FAIR principles The vocabulary used in HIRA CDM is an OMOP standardized vocabulary which house existing vocabularies used in the public domain, and details such as definition and id rules are disclosed in the wiki page (<https://github.com/OHDSI/Vocabulary-v5.0/wiki>), and the vocabulary can be searched and downloaded in the portal (<https://athena.ohdsi.org/>).

I3. (Meta)data include qualified references to other (meta)data Information on OMOP-CDM was described on the HDRN homepage, and a link was attached so that qualified information on the OMOP-CDM could be obtained.

#### Common Data Model (CDM)

- The Common Data Model (CDM) refers to a data model that standardizes the different data structures and meanings of each partner organization into a standardized structure to have the same structure and meaning.
- The Common Data Model (CDM) standardizes data models, terminology, analysis methods, methodologies, etc., and establishes the basis for RWE (Real World Evidence), such as repeatable, reproducible, generalizable, robust, and correctable, for existing analysis complexity can be eliminated.
- There are various types of Common Data Model (CDM), such as Sentinel CDM, PCORnet CDM, and OMOP (Observational Medical Outcome Partners) CDM.
- OMOP-CDM is used in health care research on various topics such as drug/device side effect study, comparative effect study, economic analysis, medical quality evaluation, clinical study, etc. For more information on OMOP CDM, please refer to the OHDSI website.  
<https://www.ohdsi.org/data-standardization/the-common-data-model/>

---

<https://hdrn.mohw.go.kr/EXDRN/Portal/Enterprise/DefaultPage.bzr?tabID=1020&ftab=1003>

---

## Reusable

R1. (Meta)data are richly described with a plurality of accurate and relevant attributes

The HIRA discloses sample data and documents of HIRA CDM including sufficient meta information (definition of patients, data period, gender/age standardization (yes/no), including sensitive diseases (yes/no), etc.). The sample data of HIRA CDM is also provided in the HDRN platform (URL: <https://hdrn.mohw.go.kr>).

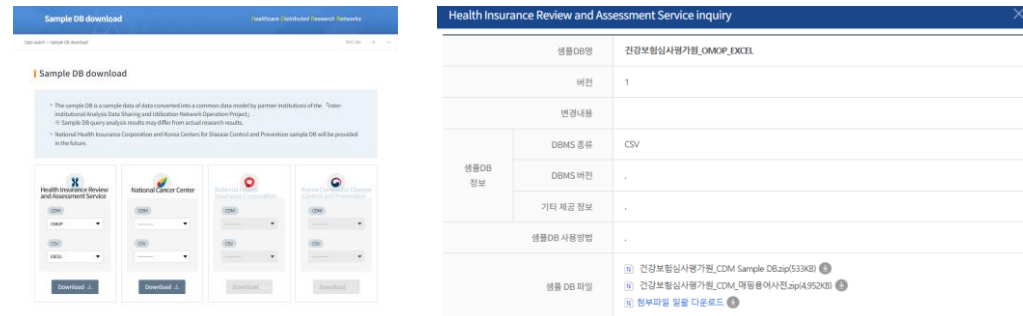

R1.1. (Meta)data are released with a clear and accessible data usage license

OMOP-CDM follows Apache 2.0 license, and Athena including standardized vocabularies follows the Unlicense. HIRA CDM is not open itself to the outside, and research is conducted by sharing analysis packages with Apache 2.0 licenses from external researchers.

R1.2. (Meta)data are associated with detailed provenance

Research results analyzed through the HIRA CDM should include information about data sources in Methods and information about data provision by HIRA in Acknowledgment within the research publication.

R1.3. (Meta)data meet domain-relevant community standards

The data structure of HIRA CDM is fully conformed with OMOP-CDM version 5.3.1 and the detailed specification can be found in the GitHub wiki page and repository.

Wiki: <https://ohdsi.github.io/CommonDataModel/cdm53.html>

Data definition language (DDL) GitHub repository :

<https://github.com/OHDSI/CommonDataModel/blob/v5.3.1/Oracle/OMOP%20CDM%20oracle%20ddl.txt>

---

FAIR: Findability, Accessibility, Interoperability, and Reuse of digital assets; HIRA: health insurance review and assessment service.

## REFERENCES

1. Williams, R.D., Markus, A.F., Yang, C. *et al.* Seek COVER: using a disease proxy to rapidly develop and validate a personalized risk calculator for COVID-19 outcomes in an international network. *BMC Med Res Methodol* **22**, 35 (2022). <https://doi.org/10.1186/s12874-022-01505-z>
